# Supplementary material for: Short and efficient synthesis of a daunosamine donor from l-fucal
Source: Royal Society of Chemistry journal article supplement (doi:10.1039/c4ra01056f), 2014-01-01

## Short and Efficient Synthesis of a Daunosamine Donor from L-Fucal.

### SUPPLEMENTARY INFORMATION

Markus Ohlin, Sophie Manner, Johanna Löfgren, Andrea Persson and Ulf Ellervik\*

Center for Analysis and Synthesis, Center for Chemistry and Chemical Engineering, Lund University, P.O. Box 124, SE-221 00 Lund, Sweden.

E-mail: ulf.ellervik@chem.lu.se

#### TABLE OF CONTENTS

|                                                                  |     |
|------------------------------------------------------------------|-----|
| 1. Summary. Optimizations of 1,4-addition with azide in Route C. | S2  |
| 2. NMR of <b>1<math>\alpha</math></b> .                          | S3  |
| 3. NMR of <b>5</b> .                                             | S5  |
| 4. NMR of <b>9</b> .                                             | S7  |
| 5. NMR of <b>10<math>\alpha</math></b> .                         | S9  |
| 6. NMR of <b>12<math>\alpha</math></b> .                         | S11 |

## 1. Summary. Optimizations of 1,4-addition with azide in Route C.

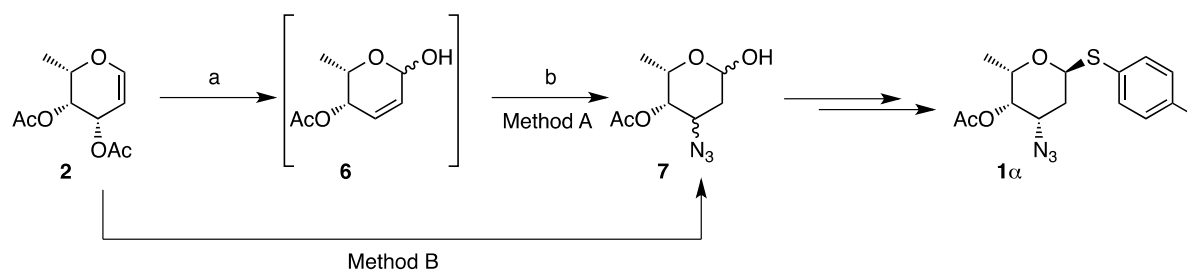

**Scheme S3:** Optimization of synthesis of **6**. a) H<sub>2</sub>O, 100 °C microwave. b) NaN<sub>3</sub>, HOAc. Method A: sequential reaction. Method B: one-pot reaction.

**Table 1. Conditions for optimizing**

| Method | Time (min.) | Temp. (°C) | Conc. (M) | equiv. N <sub>3</sub> | Yield (%) | Conv. (%) | Comment          |
|--------|-------------|------------|-----------|-----------------------|-----------|-----------|------------------|
| A      | 1440        | rt         | 0,25      | 1,6                   | 16        |           |                  |
| A      | 10          | 100        | 0,25      | 1,6                   |           | 19        | trace <b>5</b>   |
| A      | 15          | 100        | 0,25      | 1,6                   | 17        |           |                  |
| A      | 30          | 100        | 0,25      | 1,6                   | 16        |           |                  |
| A      | 10          | 100        | 0,25      | 4,0                   | 30        |           |                  |
| A      | 10          | 100        | 0,25      | 6,0                   | 32        |           |                  |
| A      | 10          | 100        | 0,50      | 4,0                   | 29        |           |                  |
| B      | 20          | 100        | 0,25      | 1,6                   |           | 22        | 15 mol% <b>5</b> |
| B      | 25          | 100        | 0,25      | 1,6                   |           | 20        | 8 mol% <b>5</b>  |
| B      | 30          | 100        | 0,25      | 1,6                   |           | 18        | trace <b>5</b>   |
| B      | 10          | 120        | 0,25      | 1,6                   | 8         |           |                  |

## 2. NMR of 1 $\alpha$ .

(Fan, E.; Shi, W.; Lowary, T. L. *J. Org. Chem.* **2007**, *72*, 2917-2928.)

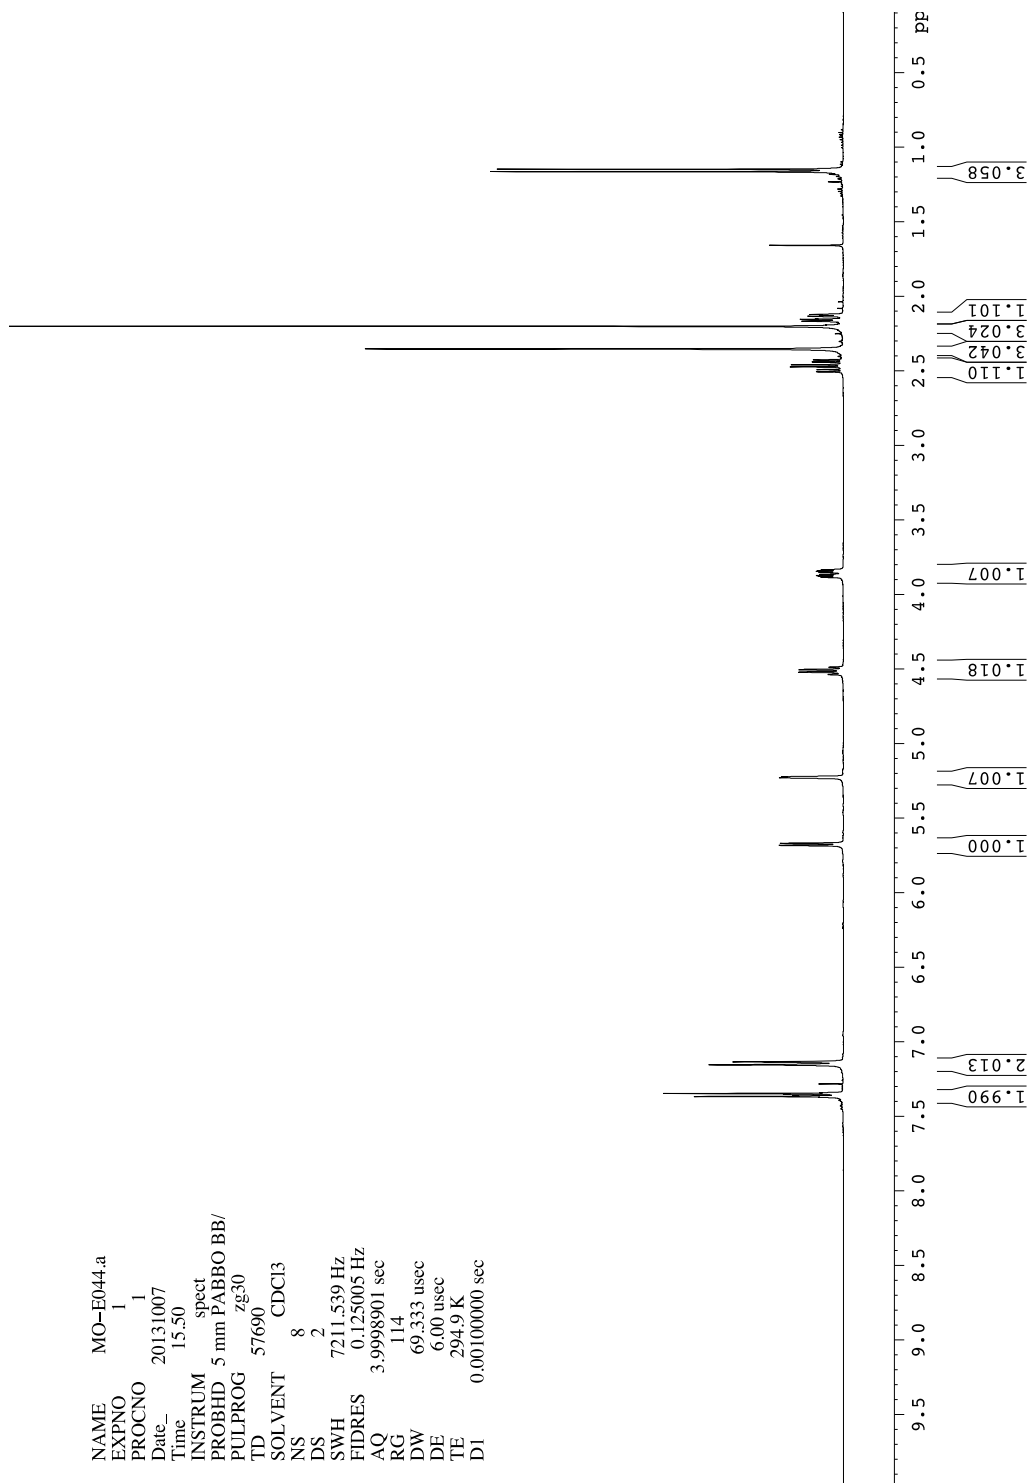

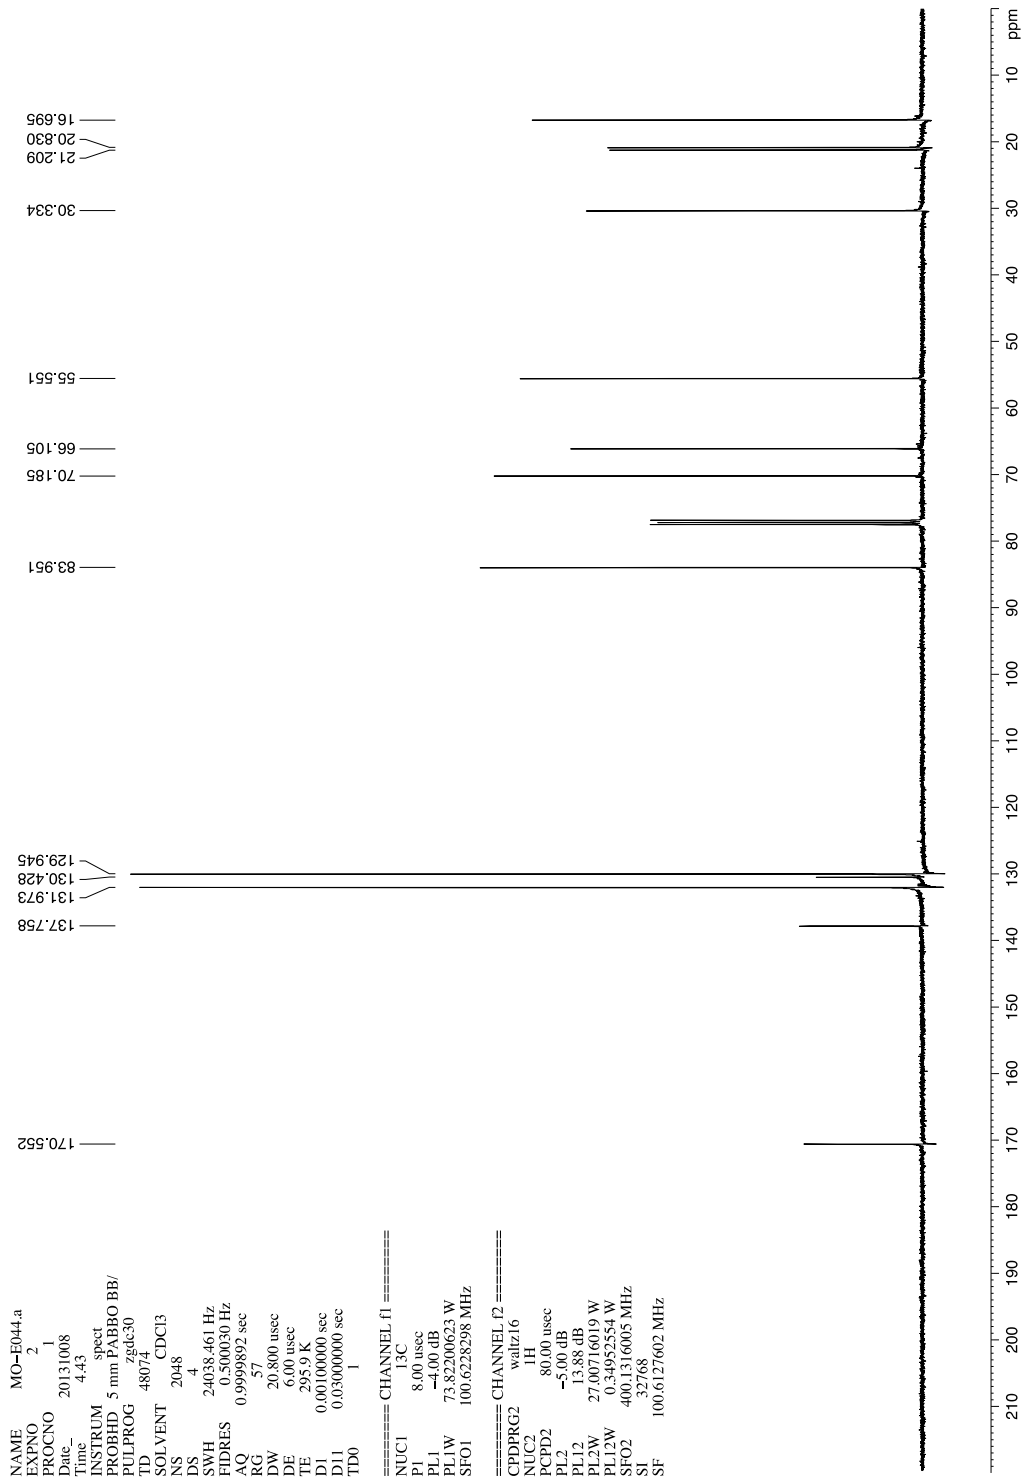

### 3. NMR of 5.

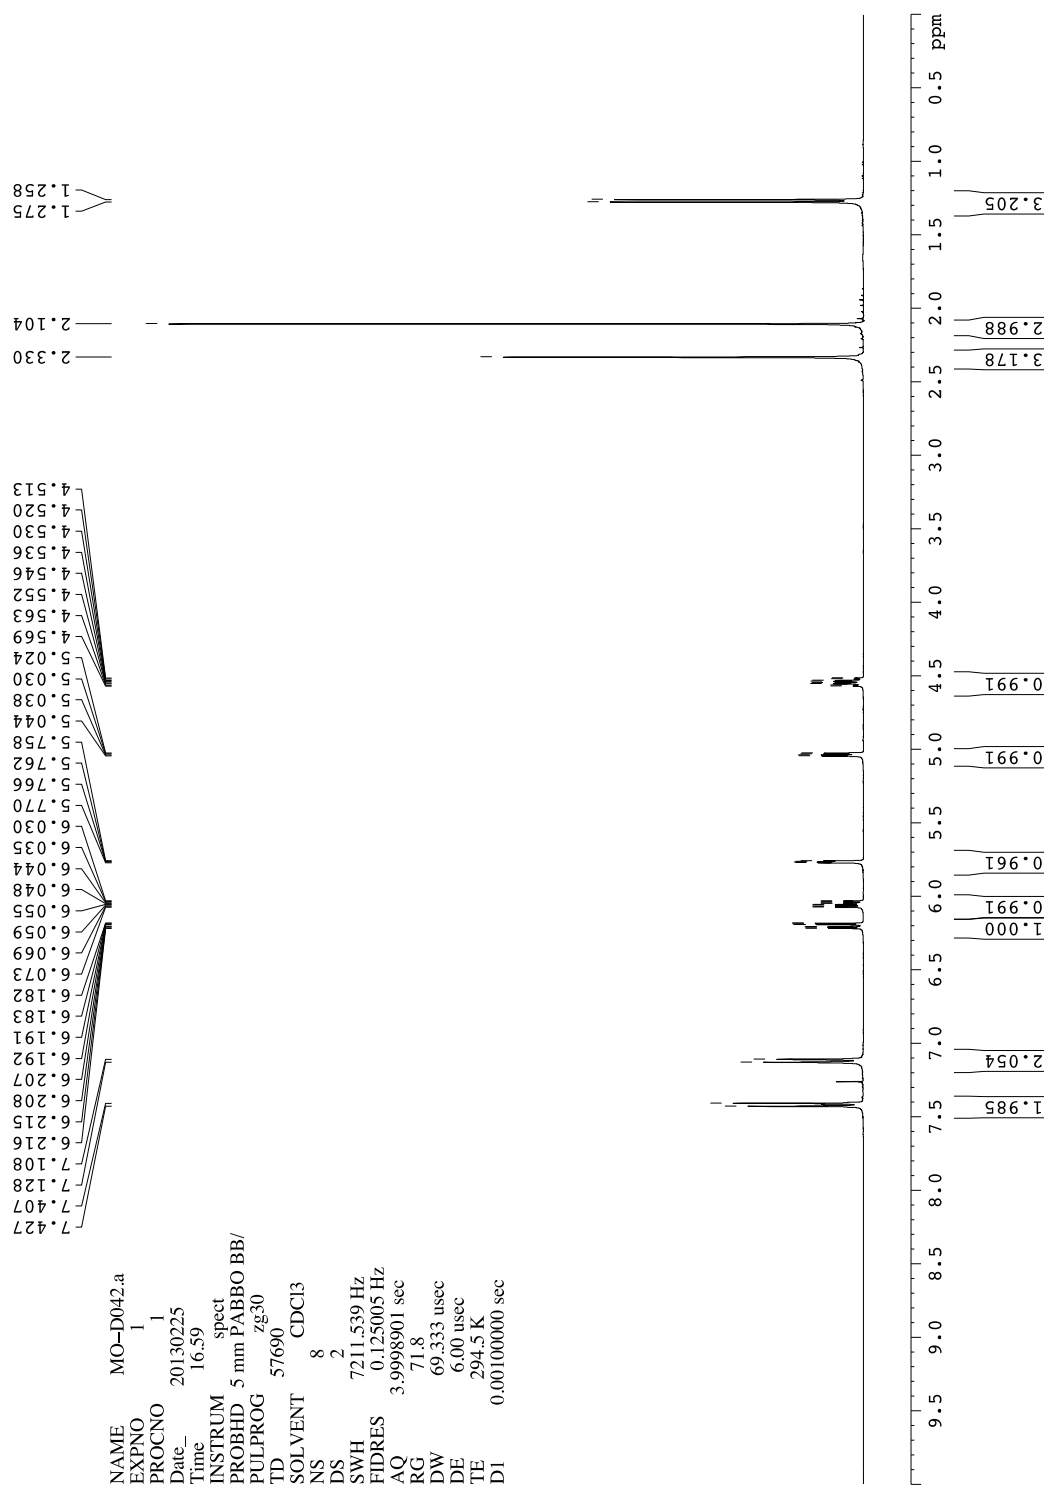

NAME MO-D042.a  
EXPNO 3  
PROCNO 1  
Date\_ 20130301  
Time 22:25  
INSTRUM spect  
PROBHD 5 mm PABBO BE/  
PULPROG zgpg30  
TD 48074  
SOLVENT CDC13  
NS 2048  
DS 4  
SWH 24038.461 Hz  
FIDRES 0.500030 Hz  
AQ 0.9999892 sec  
RG 57  
DW 20.800 usec  
DE 6.00 usec  
TE 295.8 K  
D1 0.00100000 sec  
D11 0.03000000 sec  
TD0 1  
===== CHANNEL f1 =====  
NUC1 13C  
P1 8.50 usec  
PL1 -3.00 dB  
PL1W 58.63890457 W  
SFO1 100.6228298 MHz  
===== CHANNEL f2 =====  
CPDPRG2 waltz16  
NUC2 1H  
PCPD2 80.00 usec  
PL2 -4.00 dB  
PL12 14.06 dB  
PL2W 21.45254898 W  
PL12W 0.33533499 W  
SFO2 400.1316005 MHz  
SI 32768  
SF 100.6127612 MHz

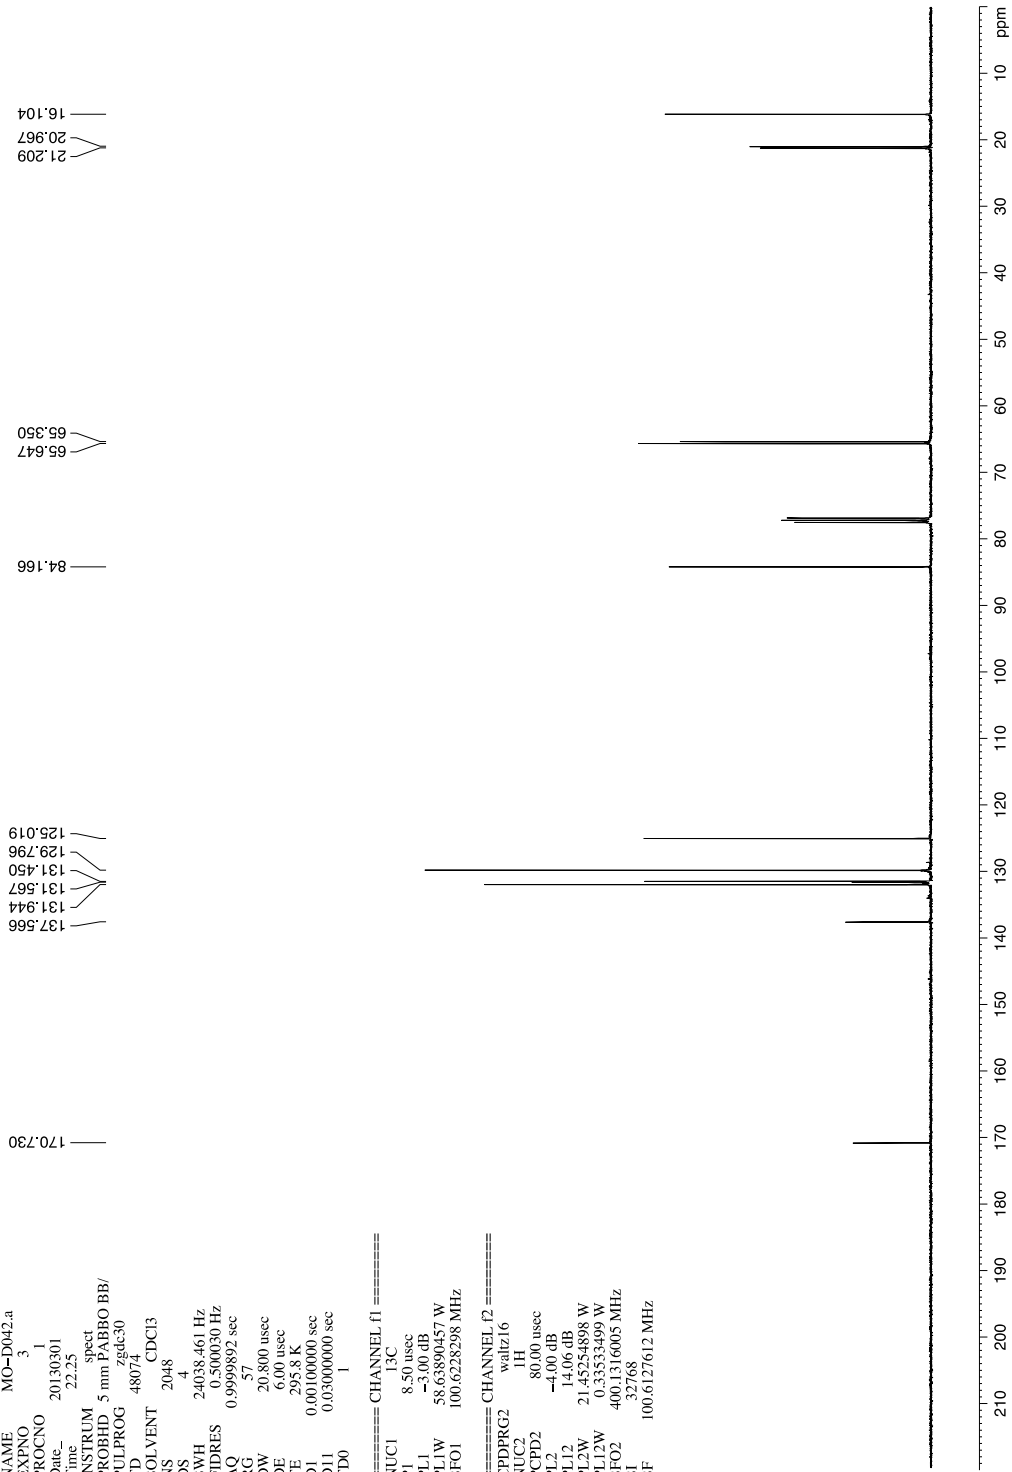

```

NAME      MO-D042.a
EXPNO    3
PROCNO   1
Date_    20110301
Time     22.25
INSTRUM  spect
PROBHD   5 mm PABBO BB/
PULPROG  zgpg30
TD       48074
SOLVENT  CDCl3
NS       2048
DS       4
SWH      24038.461 Hz
FIDRES   0.500030 Hz
AQ       0.9999892 sec
RG       57
DW       20.800 usec
DE       6.00 usec
TE       295.8 K
D1       0.001000000 sec
D11      0.030000000 sec
TD0      1
===== CHANNEL f1 =====
NUC1     13C
P1       8.50 usec
PL1      -3.00 dB
PL1W    58.63890457 W
SFO1    100.628298 MHz
===== CHANNEL f2 =====
CPDPRG2  waltz16
NUC2     1H
PCPD2    80.00 usec
PL2      -4.00 dB
PL12     14.06 dB
PL12W   21.45254898 W
PL12W   0.33533499 W
SFO2    400.1316005 MHz
SI       32768
SF      100.6127612 MHz

```

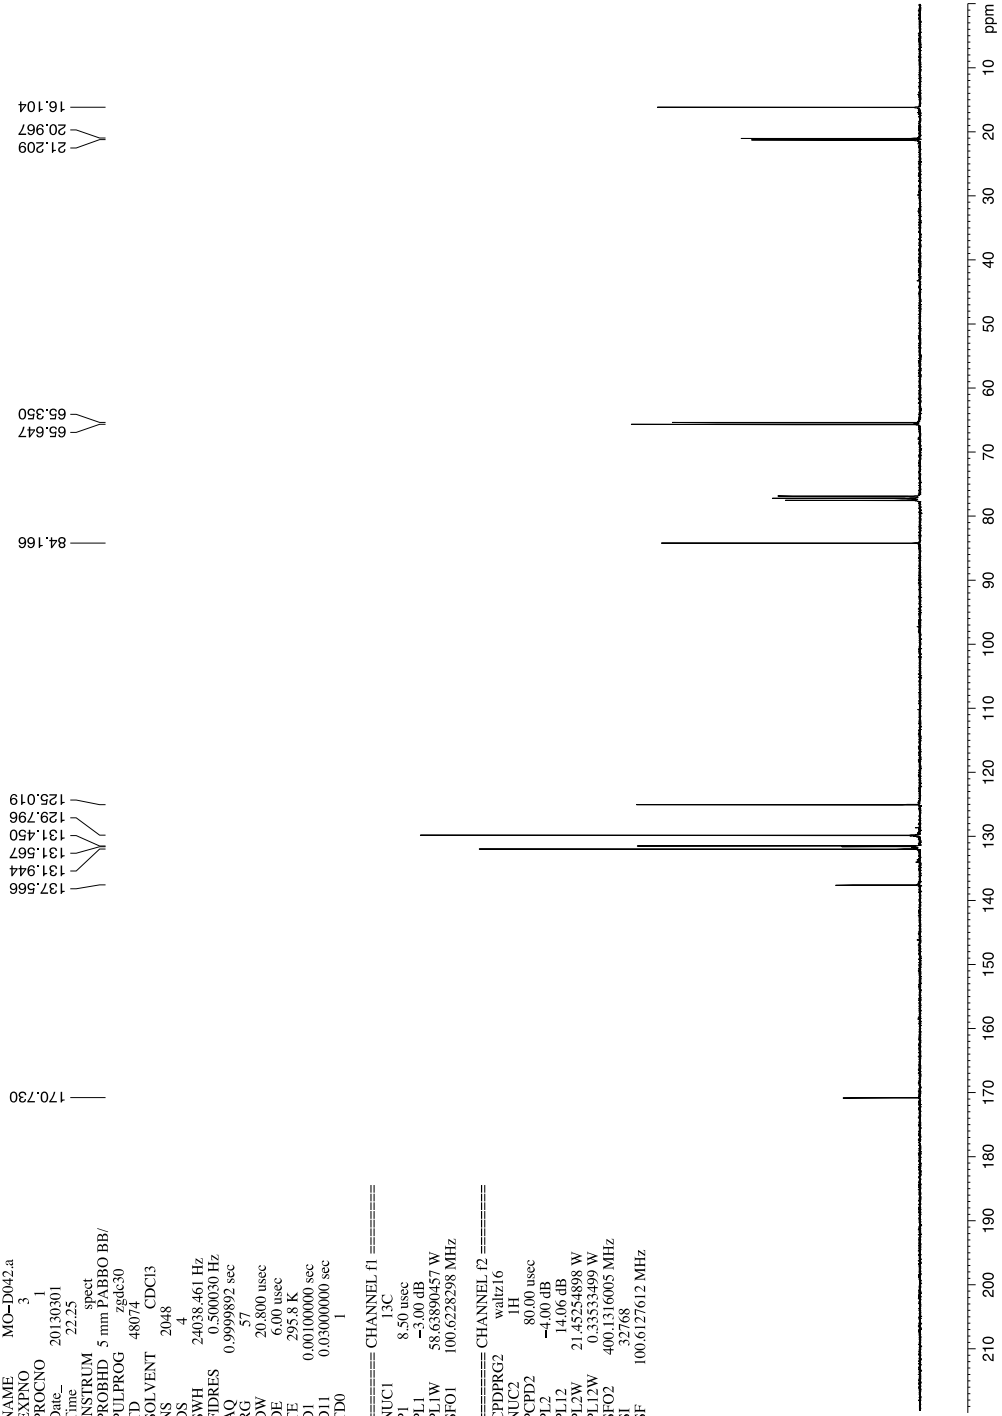

# 4. NMR of 9.

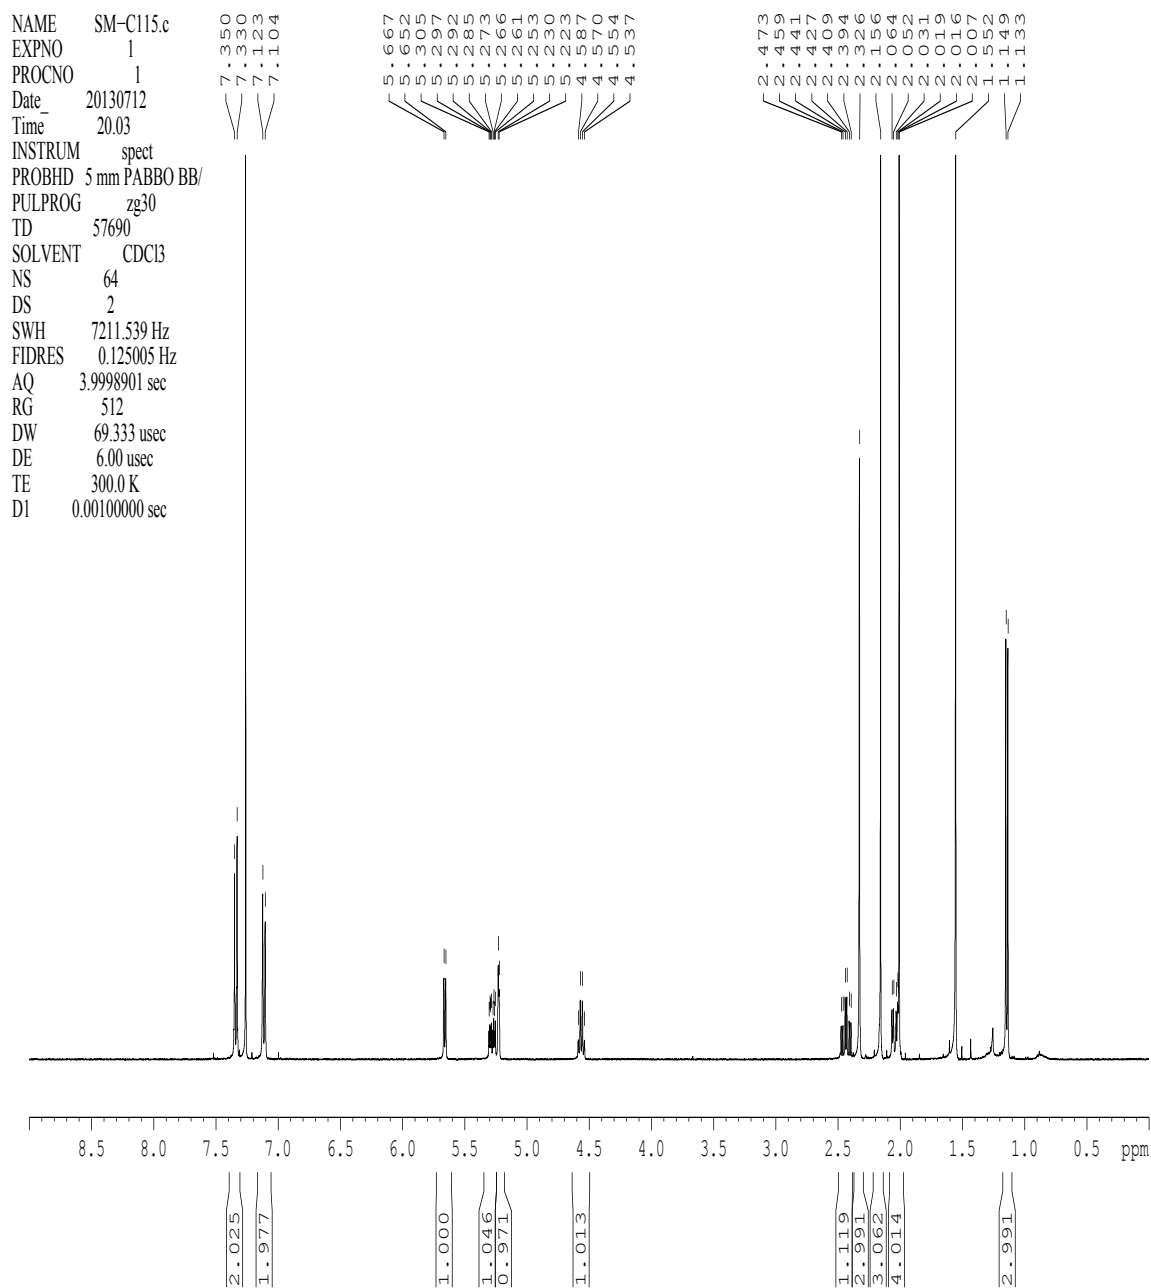



```

NAME SM-C115.c
EXPNO 10
PROCNO 1
Date_ 20131113
Time 12.45
INSTRUM spect
PROBHD 5 mm PARBO BB/
PULPROG zgpg30
TD 48074
SOLVENT CDCl3
NS 1024
DS 4
SWH 24038.461 Hz
FIDRES 0.500030 Hz
AQ 0.9999892 sec
RG 57
DW 20.800 usec
DE 6.00 usec
TE 295.7 K
D1 0.00100000 sec
D11 0.03000000 sec
TD0 1
===== CHANNEL f1 =====
NUC1 13C
P1 8.00 usec
PL1 -4.00 dB
PL1W 73.82200623 W
SFO1 100.6228298 MHz
===== CHANNEL f2 =====
CPDPRG2 waltz16
NUC2 1H
PCPD2 80.00 usec
PL2 -5.00 dB
PL12 13.88 dB
PL2W 27.00716019 W
PL12W 0.34952554 W
SFO2 400.1316005 MHz
SI 32768
SF 100.6127593 MHz

```

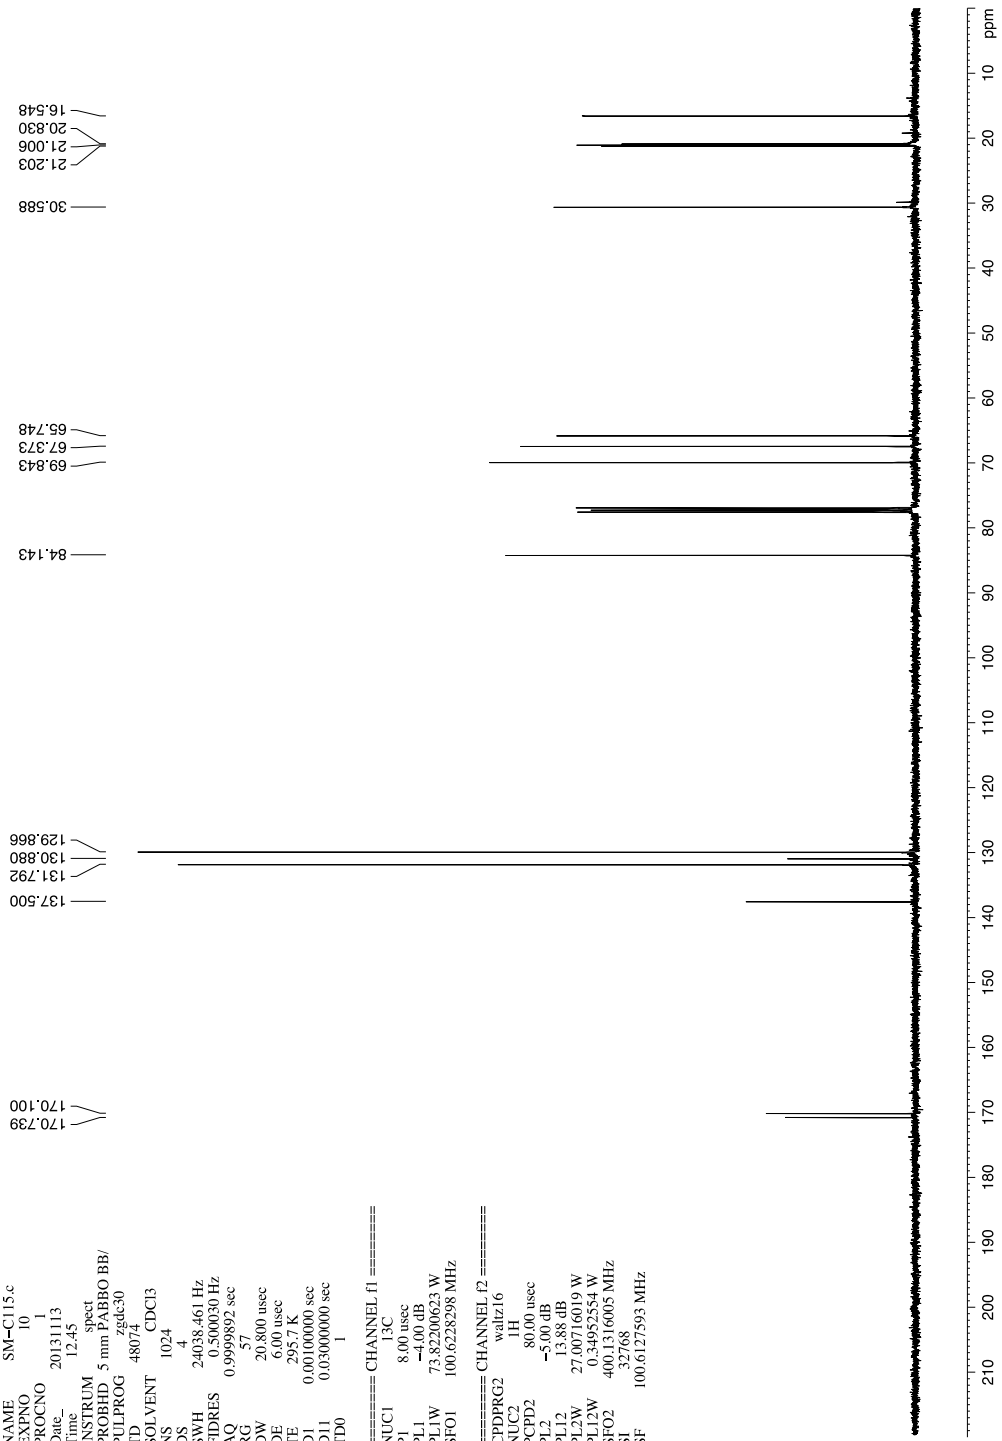

# 5. NMR of 10 $\alpha$ .

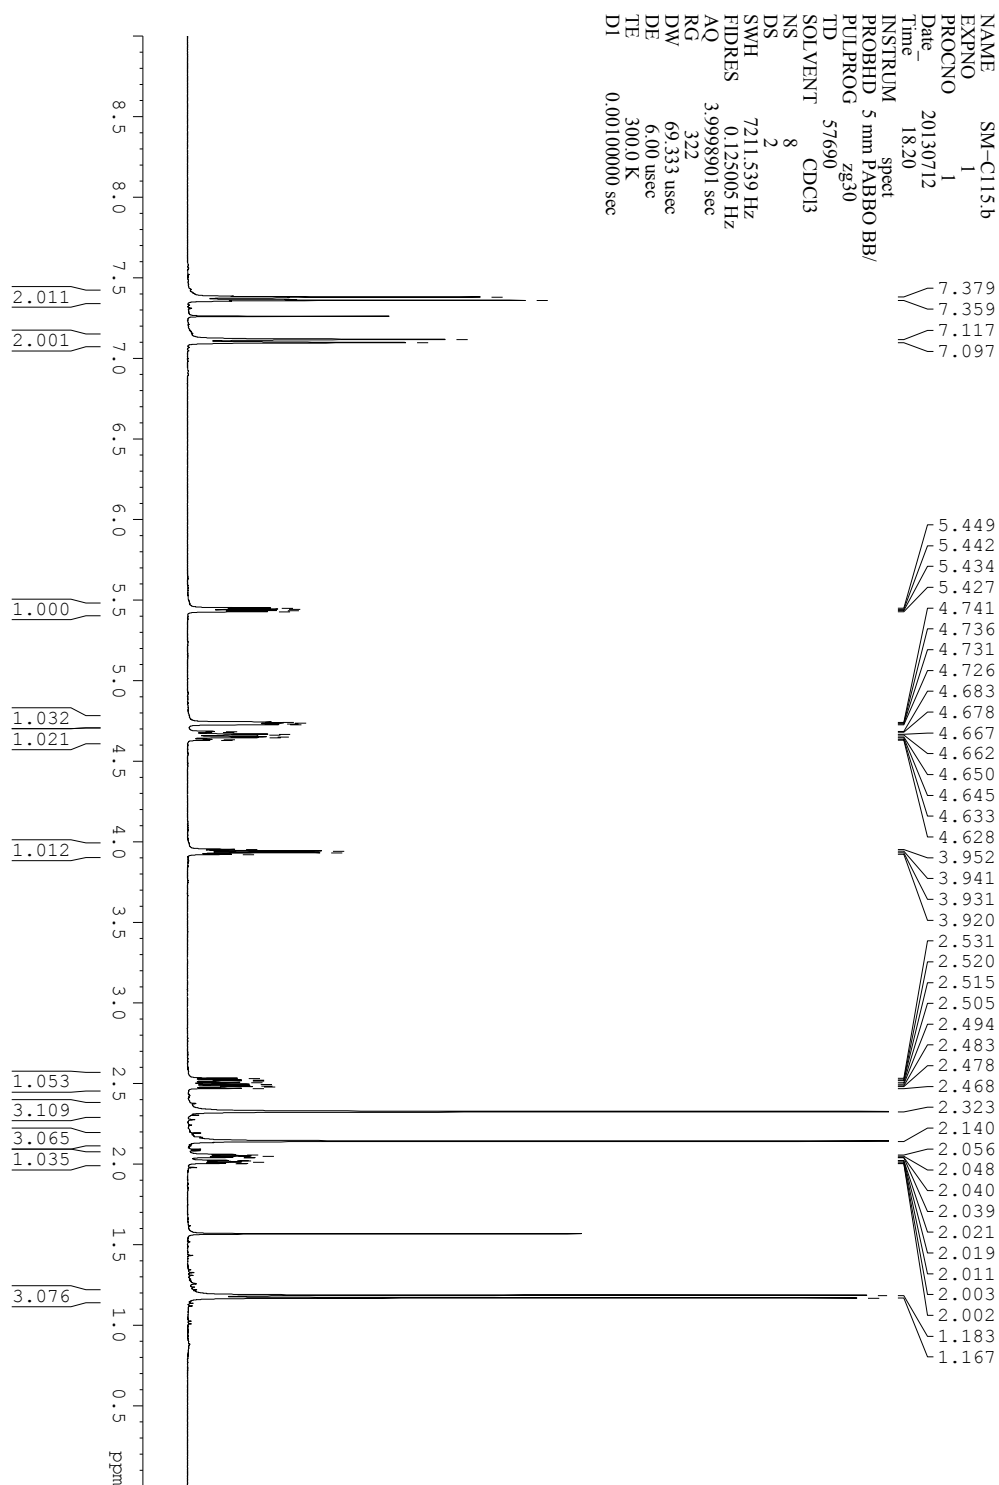

NAME SM-C115b  
 EXPNO 4  
 PROCNO 1  
 Date\_ 20130713  
 Time 23.18  
 INSTRUM spect  
 PROBHD 5 mm PABBO BB/  
 PULPROG zgdc30  
 TD 48074  
 SOLVENT CDCl3  
 NS 3072  
 DS 4  
 SWH 24038.461 Hz  
 FIDRES 0.500030 Hz  
 AQ 0.9999892 sec  
 RG 57  
 DW 20.800 usec  
 DE 6.00 usec  
 TE 300.0 K  
 D1 0.00100000 sec  
 D11 0.03000000 sec  
 TD0 1

==== CHANNEL f1 =====

NUC1 13C  
 P1 8.00 usec  
 PL1 -4.00 dB  
 PL1W 73.8220623 W  
 SFO1 100.6228298 MHz

==== CHANNEL f2 =====

CPDPRG2 waltz16  
 NUC2 1H  
 PCPD2 80.00 usec  
 PL2 -5.00 dB  
 PL12 13.88 dB  
 PL2W 27.00716019 W  
 PL12W 0.34952554 W  
 SFO2 400.1316005 MHz  
 SI 32768  
 SF 100.6127561 MHz

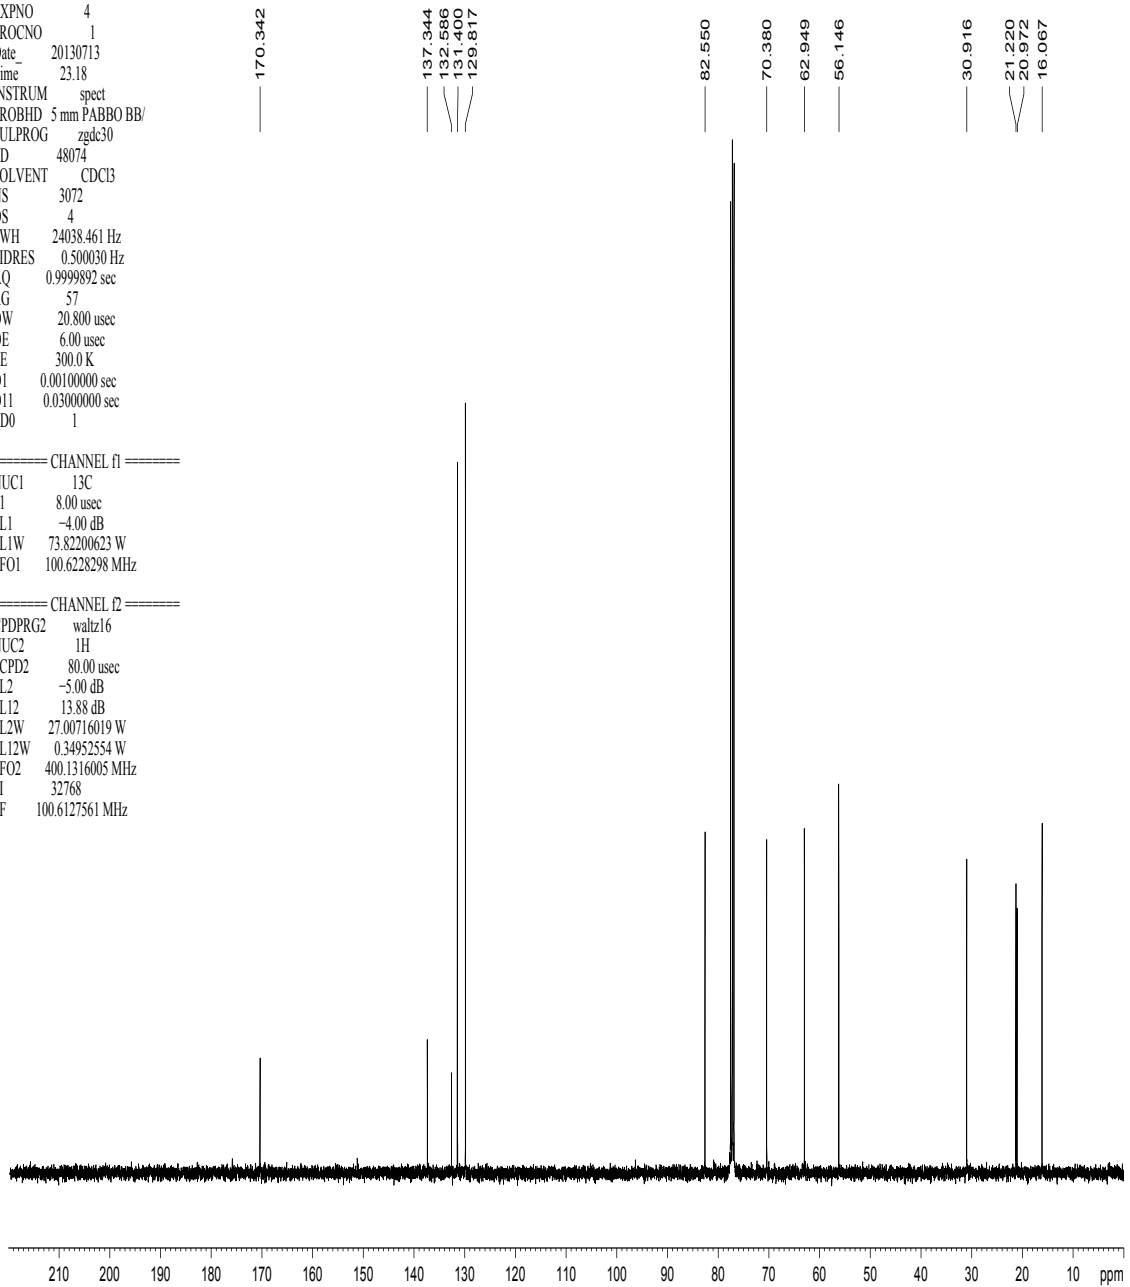

# 6. NMR of 12 $\alpha$ .

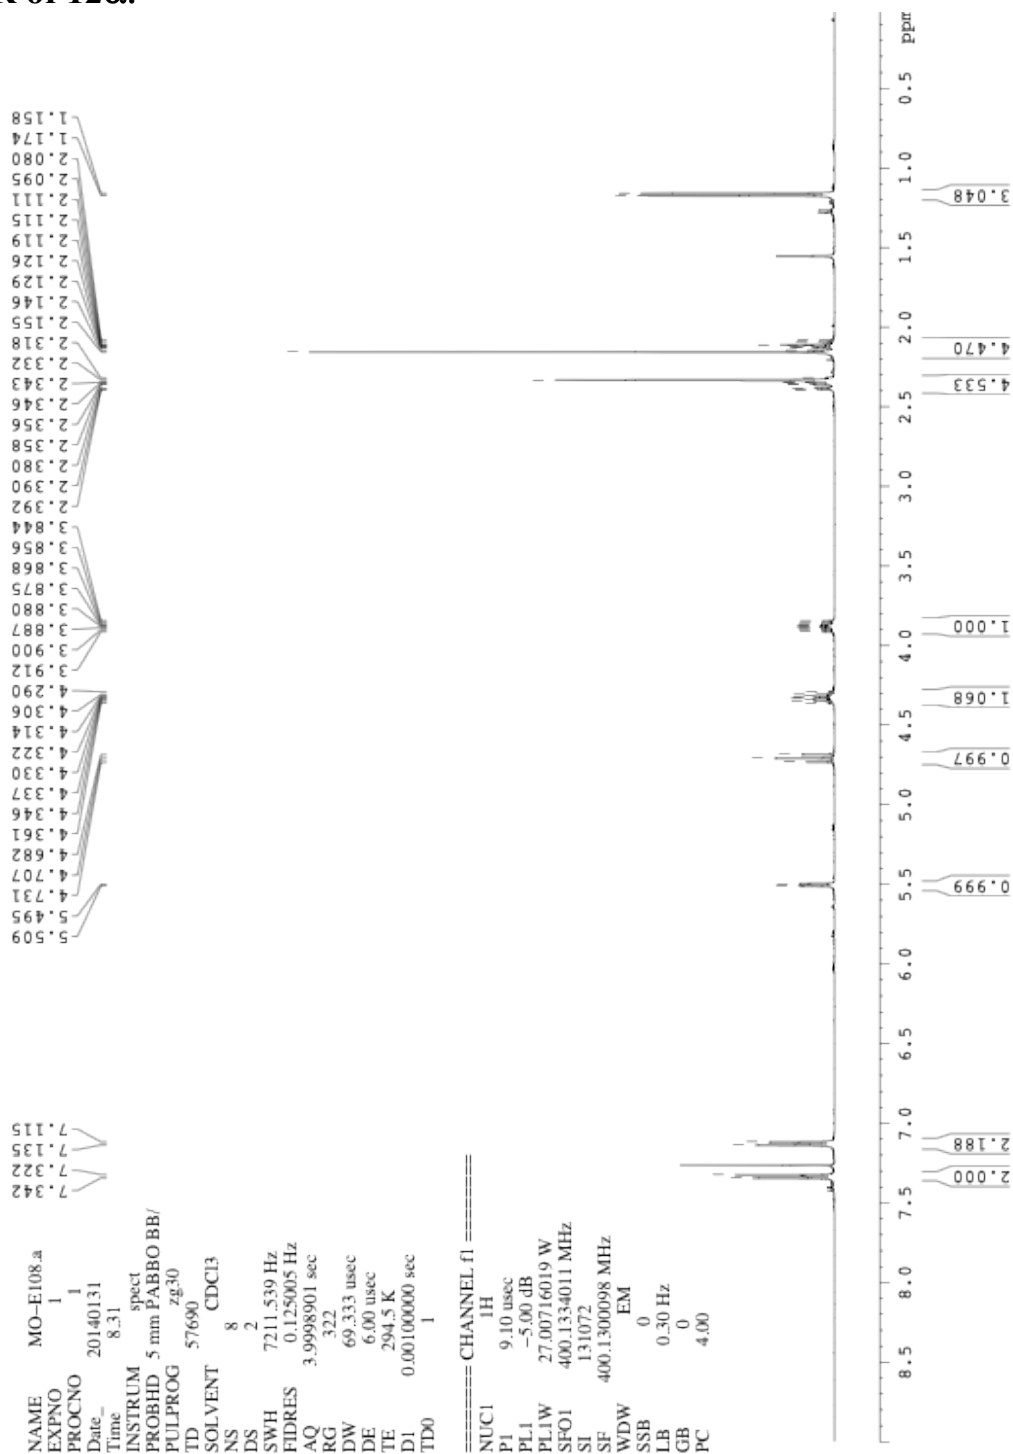

NAME MO-E1108.a  
EXPNO 3  
PROCNO 1  
Date\_ 20140204  
Time 21:35  
INSTRUM spect  
PROBHD 5 mm F4BBO BB/  
PULPROG zgpg30  
TD 48074  
SOLVENT CDCl3  
NS 5120  
DS 4  
SWH 24038.461 Hz  
FDRRES 0.500030 Hz  
AQ 0.9999892 sec  
RG 57  
DW 20.800 usec  
DE 6.00 usec  
TE 296.0 K  
D1 0.00100000 sec  
D11 0.03000000 sec  
TD0 1

===== CHANNEL f1 =====

NUC1 13C  
P1 8.00 usec  
PL1 0.00 dB  
PL1W 73.8220623 W  
SFO1 100.6282598 MHz

===== CHANNEL f2 =====

CPDPRG2 walzr16  
NUC2 1H  
PCPD2 80.00 usec  
PL2 -5.00 dB  
PL2 13.88 dB  
PL2W 27.00716019 W  
PL12W 0.34952554 W  
SFO2 400.1316005 MHz  
SI 32768  
SF 100.6127553 MHz

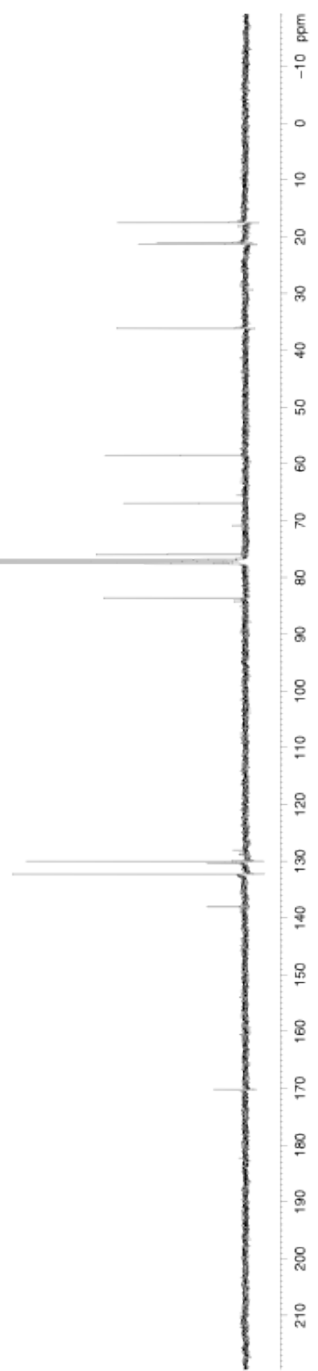

Supplement: c4ra01056f1.pdf [file c4ra01056f1.pdf]
